# Supplementary material
Source: PubMed Central journal article supplement (PMC7112119)
Supplement: mmc1.pdf [file mmc1.pdf]

| Primer | group | Forward                       | Reverse                       |
|--------|-------|-------------------------------|-------------------------------|
| PCR01  | J     | ATTGTGAGCGATTTGCGTGC          | CCAAAACCTGCTTCACGGGAC         |
| PCR02  | D     | TAACAGCTTTCAGCCAGGGA          | ACAAACCCATGGTCCATCCT          |
| PCR03  | E     | TCCCGTGAAGCAGTTTTGGT          | GCCATCTGCAAGACTACCACT         |
| PCR04  | A     | GGTGCATGATGAGCCTAAGGG         | TCACACGAGTCTTGTTCCGAA         |
| PCR05  | B     | TGAGATTGCAGAGTGCTGCT          | TGCTGGACTCCAATACACACA         |
| PCR06  | C     | GCATACTAAGAGTGCAGCAGG         | TGCTTGACCACTTACTGCCA          |
| PCR07  | D     | ACGGGAGTTGCTAGGTGTTT          | ACAGCACTAGCATAACGAGGAA        |
| PCR08  | E     | GCTCTTGCAATTTGCATGGGTT        | TCACCAGCCTTGGCCATATAA         |
| PCR09  | K     | TGCCTAGTCAAGTTCAGAAAGC        | AGGCACTAACTTTAGCACCTACA       |
| PCR10  | F     | TGGCCAAGGCTGGTGAYAAA          | TAGCAACAYAAGGCTGTCYA          |
| PCR11  | L     | TGAGGAAAGTGATGTTGAAGAAGATG    | TGCAACACACTGCCAATCAC          |
| PCR12  | J     | AGTTTTGGCAGTGATGCAGAA         | TGAAAATGACATACCATGCCCAA       |
| PCR13  | C     | ACCTTATGTGATTGGCAGTGTG        | CTGTCCAGCTGCTACTGCAA          |
| PCR14  | K     | TTGCCCAATTGTATGGTTCTTGT       | AAAGACGCGCTGCCAATTTTC         |
| PCR15  | A     | ATTGCAGTAGCAGCTGGACA          | CGTGCATCATCATCAAGTGCT         |
| PCR16  | B     | TAAGAAATTGGCAGCGCGTC          | CCAAAACCTTTCACCAACAGGCA       |
| PCR17  | L     | AGTTTTTGGTTATGTACAGCAGGG      | AAGCCATGCCTCTTGCCATT          |
| PCR18  | J     | GTGGCAGGTTGTTGTTAATGGT        | GCACTTCCTACACCCTTAGGT         |
| PCR19  | H     | TGAAATTGCATGTAAATGTGGTGAAA    | ATGTTTTAAATTGGGCTTTAATAATACGM |
| PCR20  | K     | ACCACCTATTATTTGGATGATGTTAAGAA | AATGTTGATTTCTTTGGTTTCTTTGGC   |
| PCR21  | D     | TGAGTGGCCAACAGCTACAG          | TCGCACAGCTTTAACCACATT         |
| PCR22  | L     | TGTTGTTAGAACTGCTAATGCTTTGA    | AAGTGTCTTAATCCACTGTGCAA       |
| PCR23  | J     | AATGCATTTTTGACATTTAAGTGGAGT   | TAAAAAGCTCAGGCAGCCAAGT        |
| PCR24  | E     | ATTGCATGTCAGTTCTGCTTGG        | TTGAACAAAAGCCAGTGCCA          |
| PCR25  | C     | TYGTTGGTGGYATGATACGC          | ACAGACGTACCAGTGTTAGCAG        |
| PCR26  | D     | ATCGTGATGGACAGCGCAYA          | CCTGCCGATACAGCAGAYAT          |
| PCR27  | F     | AGCTGTGCTCGTAAAAGTTKTT        | TRGGCATTAAAGCACCACART         |
| PCR28  | K     | TGTAAAACTGTTTTGAAACTGAAGC     | AAGCACACAGCCACTAGCAT          |
| PCR29  | A     | GCGTTGAAGATGTTTGTTCGC         | CCCTCATCAGCTTCCTCACA          |
| PCR30  | E     | TGGCTGTGTGCTTTCTCTG           | TGGTGTAATCACAAAAGCAGC         |
| PCR31  | B     | GCTAGTTCCATTGCTGGTGC          | GCAAGCAGCCTCCCTATATGC         |
| PCR32  | L     | ACATTTGAAGAAATGGCTCTCACT      | AGGGTCACTGTAAGAACAAGCA        |
| PCR33  | J     | ACCTATGGTAATATGACATTGAATGGTT  | AAGGACCATAAAAATCCCCATTGAAG    |
| PCR34  | C     | GCTGCTTATAACGGCAAACCA         | TCTGACGTCTTGAAACCA            |
| PCR35  | K     | GCATCAATTGGAGCTTAGTACTGG      | AGCCATAATCCAACAAACAGTGC       |
| PCR36  | D     | ATGTTTTCCAAGGACGTCAGA         | CAGAAATCAAACGACCAACAAACA      |
| PCR37  | H     | AGTKTRGCCATGTTGTTGGTT         | ARGAAAACAARCCCCAATAACAGC      |
| PCR38  | A     | GCTAAGTGGGTTGCTGTGAATG        | CCACAGCAGCTGGATTAGCA          |
| PCR39  | E     | ACTTCGGATCTGAGTGTGCTT         | ACACAACCCTTCACAGCGT           |
| PCR40  | B     | CTGTGGATAGCAAGTGCCTG          | ATCTGCCATACATTACCCGCAT        |
| PCR41  | L     | GCAATACCTTCATTGGCAGCA         | TGTACCAACAACCCAGCCTC          |
| PCR42  | J     | AGTGGTCCAGATCAGACTTGTA        | TCTGGGTGTTCAACTCGTGC          |
| PCR43  | A     | ACACACTAGCAAGAGGCTGG          | CGAGACGGGCATCTACTC            |
| PCR44  | C     | TGGATTTTGGCGGGATGGAA          | TCGCAATGCATAGCAAAGATCC        |
| PCR45  | B     | GCCACACATTGTACGCAAGG          | TGATATGGCATACTCCAGTGCT        |
| PCR46  | D     | ACCATGTGTCATGCATTGGATT        | AGCGGCAACACTAAAACAGC          |
| PCR47  | E     | GCTGATCCAGCTTTGCATGT          | TGTTGGCAGGACATTACGCT          |
| PCR48  | A     | CCGGCATCACAAGTCATTGTT         | GTGCGCATTTCATTCGCAAGT         |
| PCR49  | B     | GGATGATATGTTACGCCGCT          | CACACAACCCCATCATCACTC         |

|       |   |                              |                                |
|-------|---|------------------------------|--------------------------------|
| PCR50 | C | TTGCGAATGAATGCGCACAA         | CGTCACCATCCATCTTTACAAGC        |
| PCR51 | D | TGCGTCCAAAGGGTATATTGCT       | CTGATGCAACTGCCACAACG           |
| PCR52 | E | AGAGTGTTGGAGCTTGCGTG         | GAGAATCAATTCGCGCTCACT          |
| PCR53 | B | TGCAGAAACGCAAAGGCAA          | CTTCCCTGTACCAGGAGGTC           |
| PCR54 | K | TATCGCGCCACAACCACTTA         | TCAGTCACCATCTCAGGTAATGC        |
| PCR55 | A | TGCAAGGACCTCCTGGTACA         | AACCAAGGCGGACACTGTAT           |
| PCR56 | L | CCAGCACCACGTGTGTTATT         | ACATTTACAGAATGCGCTGTTTC        |
| PCR57 | F | TTGATACAGTGTCCGCCTTGG        | CGGCCTGTGGCACTTTATCT           |
| PCR58 | D | GCAGAAACAGCGCATTCTGTAA       | AACCAGTGGCTTCCACAACA           |
| PCR59 | E | TGTTAAACGCGTGCGTGC           | AACACTATGGCGCCAACAAC           |
| PCR60 | B | CGCTGGGATGTTGTTAGACC         | CTGTTGCAGAGCATGGCAG            |
| PCR61 | J | ACGGTGTTTGGCCGTTTATG         | CCATCCATATACACACAAGGCG         |
| PCR62 | A | CATGCATTCCACTAAACCCT         | TTAAGCTCTGGGTGGTGTCTG          |
| PCR63 | D | ACGTTACCAAGCTACAAAGC         | CGCGGTGGACCTCTTATCAT           |
| PCR64 | K | TTTGACAGTAATACCTATGGTGTCTG   | GCATAGTCCTCAAACCATACTTC        |
| PCR65 | B | CCCGGTAATGTCGGTGGTAAT        | TGCAGCTTGCAAACGAGGATA          |
| PCR66 | C | GACAGCAAACCTCCAATCTGGT       | TAGTACCAGCAGGCAACCAC           |
| PCR67 | L | CGTTTGCAAGCTGCATCTGA         | TCTGCATTCCAAGAAAACCTCTGT       |
| PCR68 | A | AGAAAAAGGAGTAGCACC GGG       | AAACAGGCTATAAGCACCCCC          |
| PCR69 | J | TGTGTAAGCCCAAGTTGAGA         | AACCATCACCCCAATGCATATC         |
| PCR70 | M | TTGGCTGGTACTGCCGTAAT         | AATGGCCAATCCATTTCTCTGG         |
| PCR71 | B | TGCATTGGGGTGATGTTTTTC        | TCATTCTCRGGAAGATCGCCTT         |
| PCR72 | G | AGTCACTGGATGGGAATTYGT        | CCTRAAAATGGAGTTGCCAGC          |
| PCR73 | M | TYTTYYGACATGTCTACAGGAA       | GGCTGCGRTACACAGCCATA           |
| PCR74 | D | TGCAACCGTKCTGGYAGTAATGA      | GTTCCACCGCGAATCAACAA           |
| PCR75 | L | TCTCAATTCWACAGAAACCATTASCACT | ACGCCCAARAGAATGCCAA            |
| PCR76 | E | TACAGGTTGTTGATTGCGGGT        | TAACAGCAAARGCCRTTGGTAA         |
| PCR77 | M | GCTACCAGTTATTTTGCTTGGCA      | ACCTTGGTATTTTTGACCTTAGCA       |
| PCR78 | K | GTTCCACATATCGTAATATGGCACTG   | TACCACCTTCTTGATAAAAATGAAAATACA |
| PCR79 | F | ACCCACAWACGABTTGTCATCCT      | ATGGRGADGGYACCGACTTA           |
| PCR80 | L | TGTA AACACAATCTATAGCACCACC   | AACAGARACATTAGCAGCAGGT         |
| PCR81 | G | ATGATAAGTCGGTRCCHTCYC        | GCAGGRCAAGTGCCTATACCAT         |
| PCR82 | M | TCTGT YTTTRWGCCTCRACCTRC     | TGCCYTGRCTRAAATACCAT           |
| PCR83 | F | YAYTTGCCRACCACAAGCAT         | AAGCATTGACAACACAACCAAGA        |
| PCR84 | G | GGTCRTGTYTCTGCGGCCTW         | TGCTGCATAATCACRCARACA          |
| PCR85 | C | TRGAACCTGTAGGTGTTTTGTA       | CTGAGAGCAGTGGRGGCAAC           |
| PCR86 | A | ARGGACCTCATTTGTGTGCAA        | TTAAGAGCGGTRAGACGACCA          |
| PCR87 | L | CGCATT AATGGGCTTGGTGT        | TGCACAGACCAGGACTAACC           |
| PCR88 | H | CTCTTGAAGCKGAAGCTCAG         | TCAGGAAGGTTGGGKTTGA            |
| PCR89 | J | GGTTAGTCCTGGTCTGTGCAT        | AACA ACTAGTCCCACATCCTGT        |
| PCR90 | D | GCGCCGTATGTAATGCTGAAC        | CTCAGGTCKCCARATGTCC            |
| PCR91 | B | TGTGGTKGTTGTTGTGATGATT       | TTGCCCCACATACCACACAG           |
| PCR92 | K | GAGGATGCTGTAAACAAACTGGT      | GGGCCACATAAGCCACAAAATA         |
| PCR93 | L | CCAGCACCAGTTTATATCTGGAC      | GCAAATCTGCCAAGAATAGCCA         |
| PCR94 | J | GACGGTCACAATAATACGCGG        | CTCCTGGTGCAATAGGCACA           |
| PCR95 | A | ATTACCGACTGCCATCAACC         | ATTGACATCAGCCTGGTTGC           |
| PCR96 | K | ACCGCATGCTAAAGACCAGT         | ACAGTGCATTGTTTATTGGGGC         |
| PCR97 | B | GCTAGCAACCAGGCTGATGT         | TCTGCAAGAATGGGGAACTGT          |
| PCR98 | L | ACTGTT CAGCAGTGT TTTGGT      | CCAGATGCCGACATAAGGTTCC         |
| PCR99 | J | AGTCCAAAACCACAGCGTCA         | GTGATTCTTCCAATTGGCCATAATTAAC   |
