# Supplementary material
Source: PubMed Central journal article supplement (PMC7112119)
Supplement: mmc2.pdf [file mmc2.pdf]

## 1- Selection of reference sequences for the Zika analysis

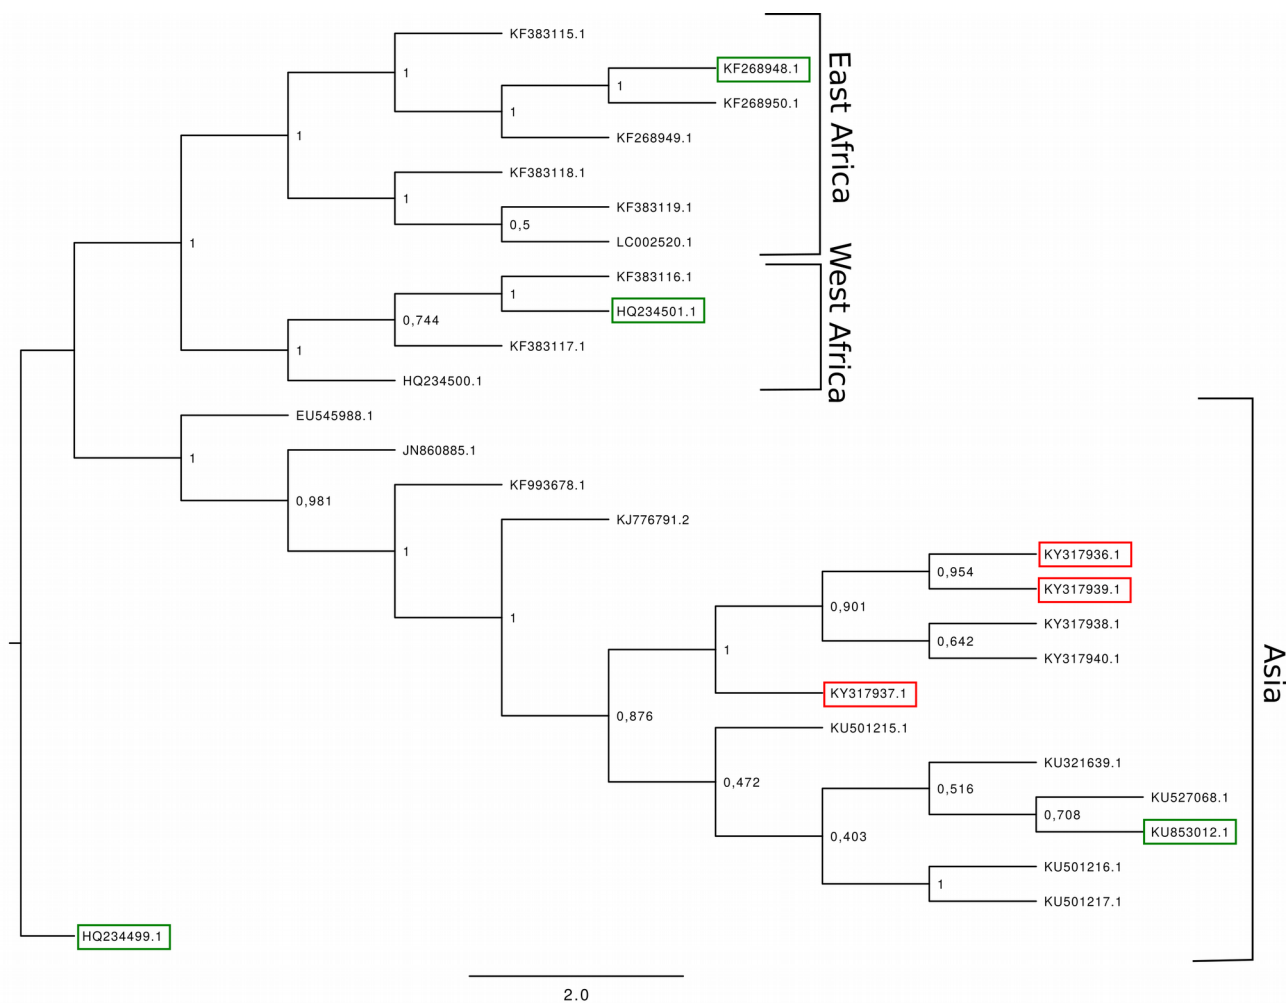

Phylogenetic tree obtained from the alignment of 27 Zika genomes. The studied genomes appears in a red box and the selected reference genomes in a green box.

Phylogenetic tree was built with MEGA (option -a infer\_NJ\_nucleotide.mao) (Kumar et al., 2016) from the alignment of 27 Zika sequences with MAFFT (Katoh et al., 2002). The phylogenetic tree picture was generated with figtree (<http://tree.bio.ed.ac.uk/>). Zika sequences were clustered depending to their location: Asia, east Africa and west africa. We selected 2 Asian sequences, 1 west African sequence and 1 east African sequence for the analysis.

Katoh, K., Misawa, K., Kuma, K., Miyata, T., 2002. MAFFT: a novel method for rapid multiple sequence alignment based on fast Fourier transform. *Nucleic Acids Res.* 30, 3059–3066.

Kumar, S., Stecher, G., Tamura, K., 2016. MEGA7: Molecular Evolutionary Genetics Analysis Version 7.0 for Bigger Datasets. *Mol. Biol. Evol.* 33, 1870–1874.  
<https://doi.org/10.1093/molbev/msw054>

## 2- Primers used for amplification of long viral genome fragments

| RT-PCR number | Forward primer ID | Forward primer sequence | Reverse primer ID | Reverse primer sequence | Expected amplicon length (pb) | PCR extension time |
|---------------|-------------------|-------------------------|-------------------|-------------------------|-------------------------------|--------------------|
| a             | PCR01_F           | ATTGTGAGCGATTTGCGTGC    | PCR01_R           | CCAAAAGTCTTACGGGAC      | 525                           | 1 min              |
| b             | PCR01_F           | ATTGTGAGCGATTTGCGTGC    | PCR03_R           | GCCATCTGCAAGACTACCAGT   | 1013                          | 1 min 30           |
| c             | PCR01_F           | ATTGTGAGCGATTTGCGTGC    | PCR05_R           | TGCTGGACTCCAATACACACA   | 1637                          | 2 min              |
| d             | PCR01_F           | ATTGTGAGCGATTTGCGTGC    | PCR06_R           | TGCTTGACCACTTACTGCCA    | 2012                          | 2 min 30           |
| e             | PCR01_F           | ATTGTGAGCGATTTGCGTGC    | PCR08_R           | TCACCAGCCTTGCCATATAA    | 2695                          | 3 min              |
| f             | PCR01_F           | ATTGTGAGCGATTTGCGTGC    | PCR09_R           | AGGCACTAACTTTAGCACCTACA | 3009                          | 3 min 30           |
| g             | PCR01_F           | ATTGTGAGCGATTTGCGTGC    | PCR11_R           | TGCAACACACTGCCAATCAC    | 3653                          | 4 min              |
| h             | PCR01_F           | ATTGTGAGCGATTTGCGTGC    | PCR12_R           | TGAAAATGACATACCATGCCCAA | 3989                          | 4 min 30           |
| i             | PCR01_F           | ATTGTGAGCGATTTGCGTGC    | PCR14_R           | AAAGACGCGCTGCCAATTC     | 4548                          | 5 min              |
| j             | PCR01_F           | ATTGTGAGCGATTTGCGTGC    | PCR16_R           | CCAAAAGTTTACCAACAGGCA   | 4975                          | 5 min 30           |

Primers used for amplification of long viral genome fragments by testing RT-PCR amplifications of different lengths, from ~500bp to ~5000bp with an increment-step of ~500 bp.

### 3- Accession numbers of the 47 HCoV-OC43 genomes aligned to design the primer set

| Accession  | Description                                               |
|------------|-----------------------------------------------------------|
| KP198610.1 | Human coronavirus OC43 strain 2058A/10                    |
| AY903460.1 | Human coronavirus OC43 strain 19572 Belgium 2004          |
| AY585229.1 | Human coronavirus OC43 serotype OC43-Paris                |
| AY903459.1 | Human coronavirus OC43 strain 87309 Belgium 2003          |
| KF923904.1 | Human coronavirus OC43 isolate 12694/2012                 |
| KJ958219.1 | Human coronavirus OC43 strain LY342                       |
| KF530078.1 | Human coronavirus OC43 strain OC43/human/USA/9612-29/1996 |
| KF530068.1 | Human coronavirus OC43 strain OC43/human/USA/007-11/2000  |
| KF923897.1 | Human coronavirus OC43 isolate 3269A/2012                 |
| KF923925.1 | Human coronavirus OC43 isolate 10574/2010                 |
| JN129834.1 | Human coronavirus OC43 strain HK04-01                     |
| KF530099.1 | Human coronavirus OC43 strain OC43/human/USA/971-5/1997   |
| KF530098.1 | Human coronavirus OC43 strain OC43/human/USA/965-6/1996   |
| KF530097.1 | Human coronavirus OC43 strain OC43/human/USA/9211-43/1992 |
| KF530096.1 | Human coronavirus OC43 strain OC43/human/USA/911-38/1991  |
| KF530095.1 | Human coronavirus OC43 strain OC43/human/USA/912-6/1991   |
| KF530094.1 | Human coronavirus OC43 strain OC43/human/USA/912-36/1991  |
| KF530092.1 | Human coronavirus OC43 strain OC43/human/USA/008-5/2000   |
| KF530091.1 | Human coronavirus OC43 strain OC43/human/USA/911-58/1991  |
| KF530090.1 | Human coronavirus OC43 strain OC43/human/USA/931-85/1993  |
| KF530089.1 | Human coronavirus OC43 strain OC43/human/USA/911-66/1991  |
| KF530088.1 | Human coronavirus OC43 strain OC43/human/USA/901-54/1990  |
| KF530087.1 | Human coronavirus OC43 strain OC43/human/USA/873-6/1987   |
| KF530086.1 | Human coronavirus OC43 strain OC43/human/USA/872-5/1987   |
| KF530085.1 | Human coronavirus OC43 strain OC43/human/USA/871-25/1987  |
| KF530084.1 | Human coronavirus OC43 strain OC43/human/USA/951-18/1995  |
| KF530083.1 | Human coronavirus OC43 strain OC43/human/USA/873-19/1987  |
| KF530082.1 | Human coronavirus OC43 strain OC43/human/USA/912-11/1991  |
| KF530081.1 | Human coronavirus OC43 strain OC43/human/USA/991-5/1999   |
| KF530080.1 | Human coronavirus OC43 strain OC43/human/USA/9712-31/1997 |
| KF530079.1 | Human coronavirus OC43 strain OC43/human/USA/913-29/1991  |
| KF530077.1 | Human coronavirus OC43 strain OC43/human/USA/873-16/1987  |
| KF530076.1 | Human coronavirus OC43 strain OC43/human/USA/911-11/1991  |
| KF530075.1 | Human coronavirus OC43 strain OC43/human/USA/953-23/1995  |
| KF530074.1 | Human coronavirus OC43 strain OC43/human/USA/9212-33/1992 |
| KF530073.1 | Human coronavirus OC43 strain OC43/human/USA/8912-37/1989 |
| KF530072.1 | Human coronavirus OC43 strain OC43/human/USA/9712-13/1997 |
| KF530071.1 | Human coronavirus OC43 strain OC43/human/USA/925-1/1992   |
| KF530070.1 | Human coronavirus OC43 strain OC43/human/USA/991-19/1999  |
| KF530069.1 | Human coronavirus OC43 strain OC43/human/USA/982-4/1998   |
| KF530067.1 | Human coronavirus OC43 strain OC43/human/USA/912-10/1991  |
| KF530066.1 | Human coronavirus OC43 strain OC43/human/USA/901-33/1990  |
| KF530065.1 | Human coronavirus OC43 strain OC43/human/USA/901-41/1990  |
| KF530064.1 | Human coronavirus OC43 strain OC43/human/USA/9612-9/1996  |
| KF530063.1 | Human coronavirus OC43 strain OC43/human/USA/9612-48/1996 |
| KF530061.1 | Human coronavirus OC43 strain OC43/human/USA/901-43/1990  |
| KF530060.1 | Human coronavirus OC43 strain OC43/human/USA/851-15/1985  |

# 4- Study of the cluster size distribution for the 99 amplicons

## MDS-1

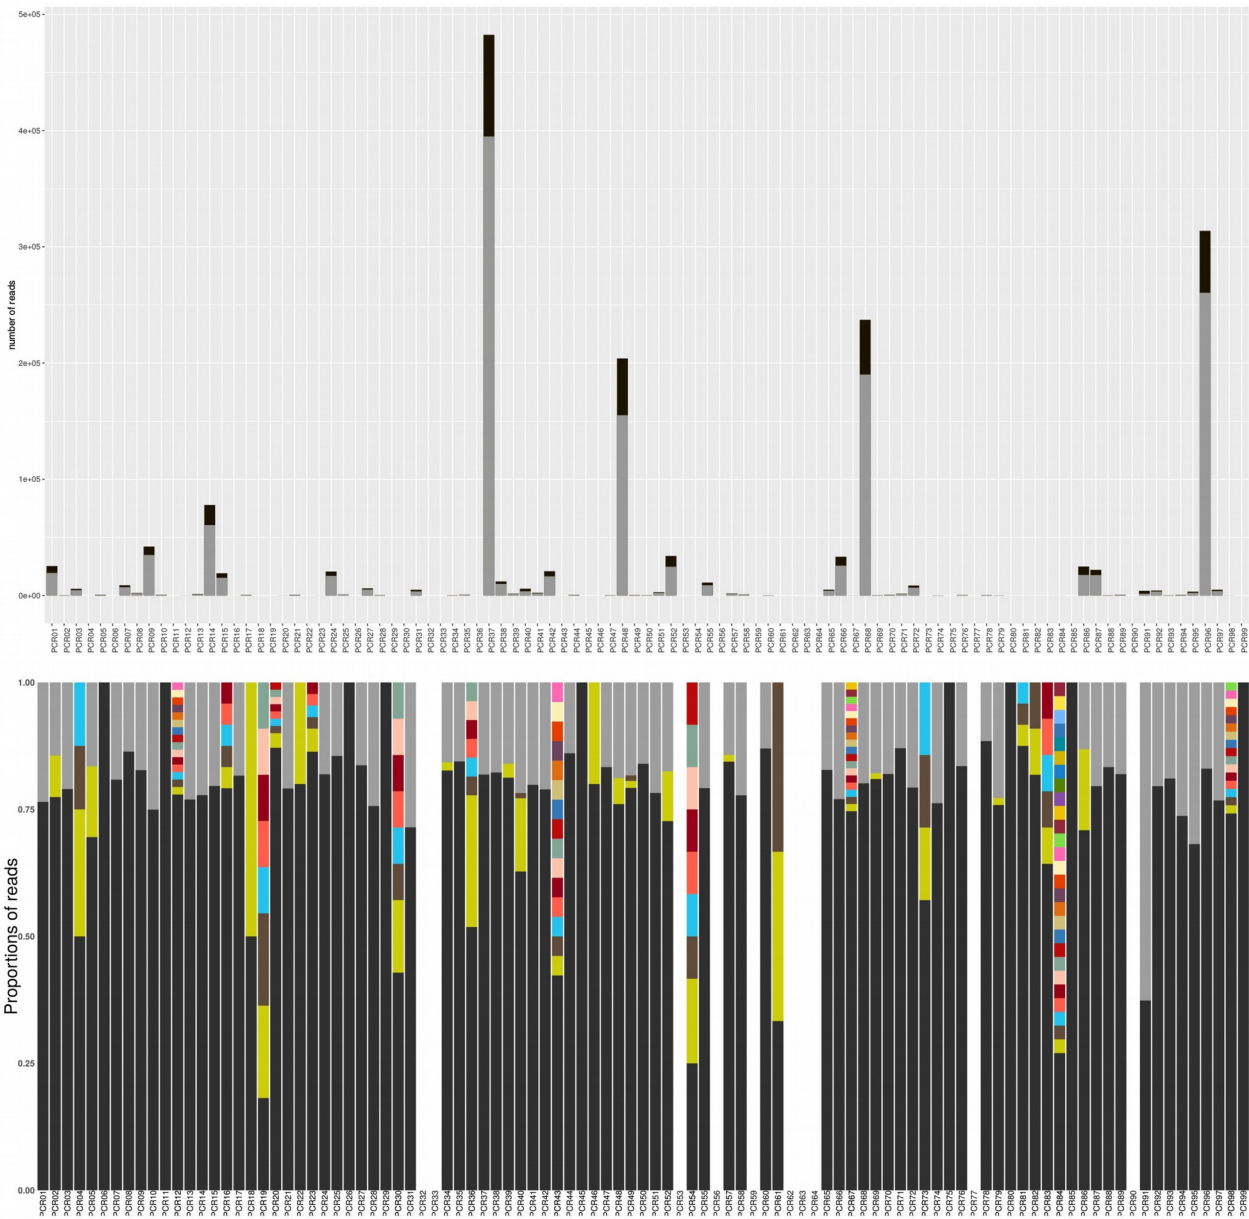

# MDS-2

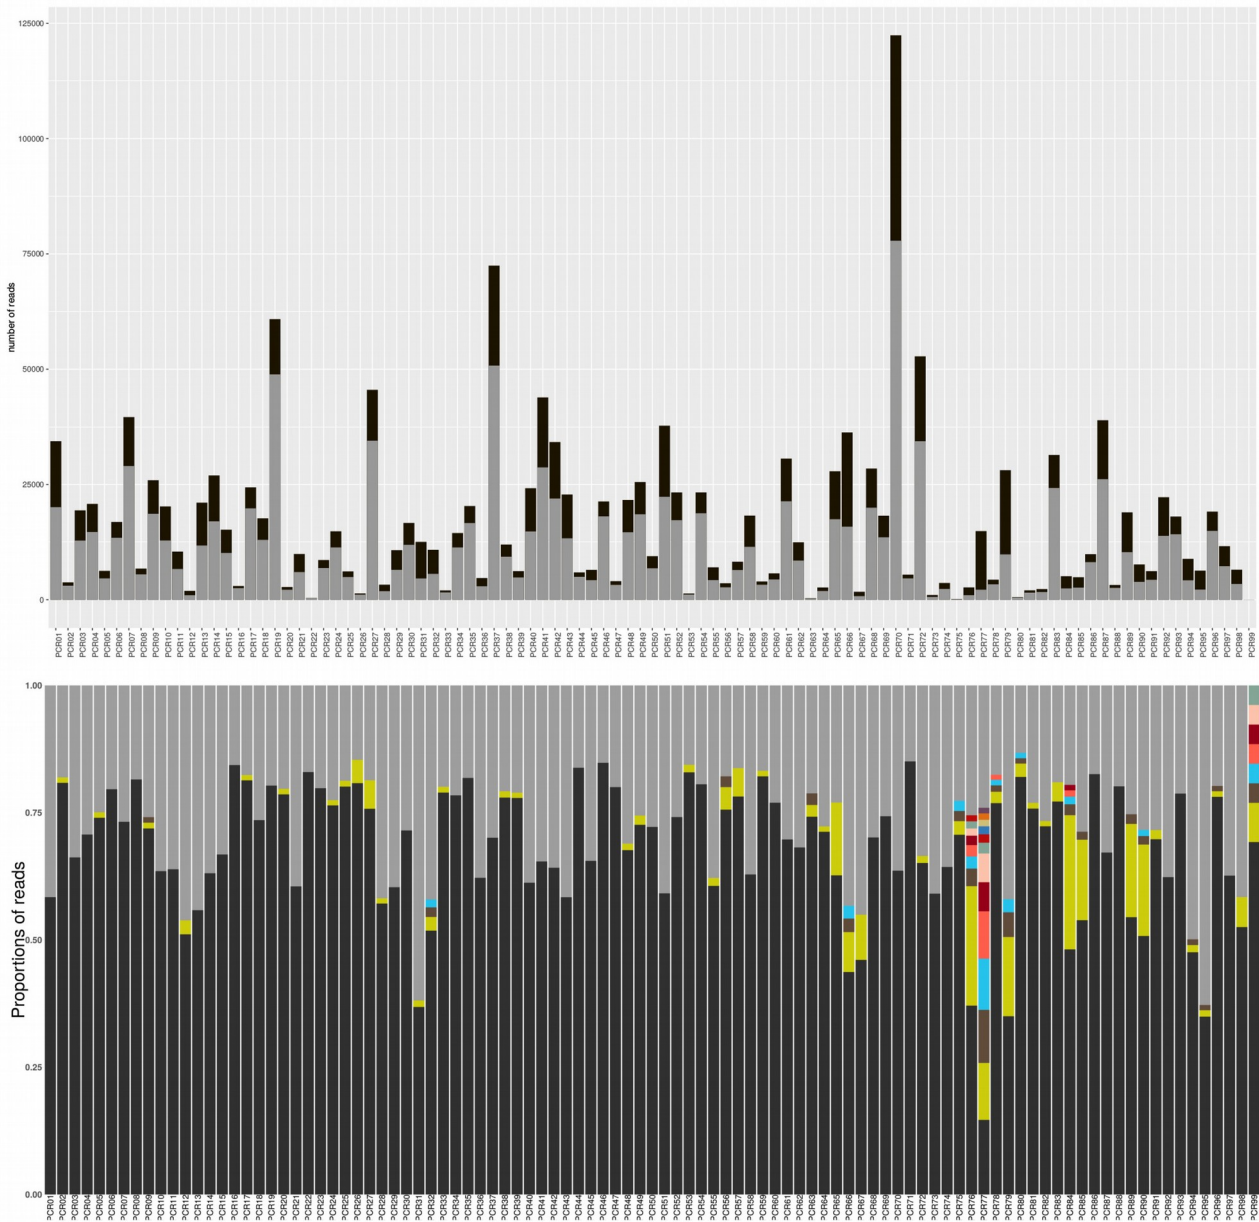

# MDS-5

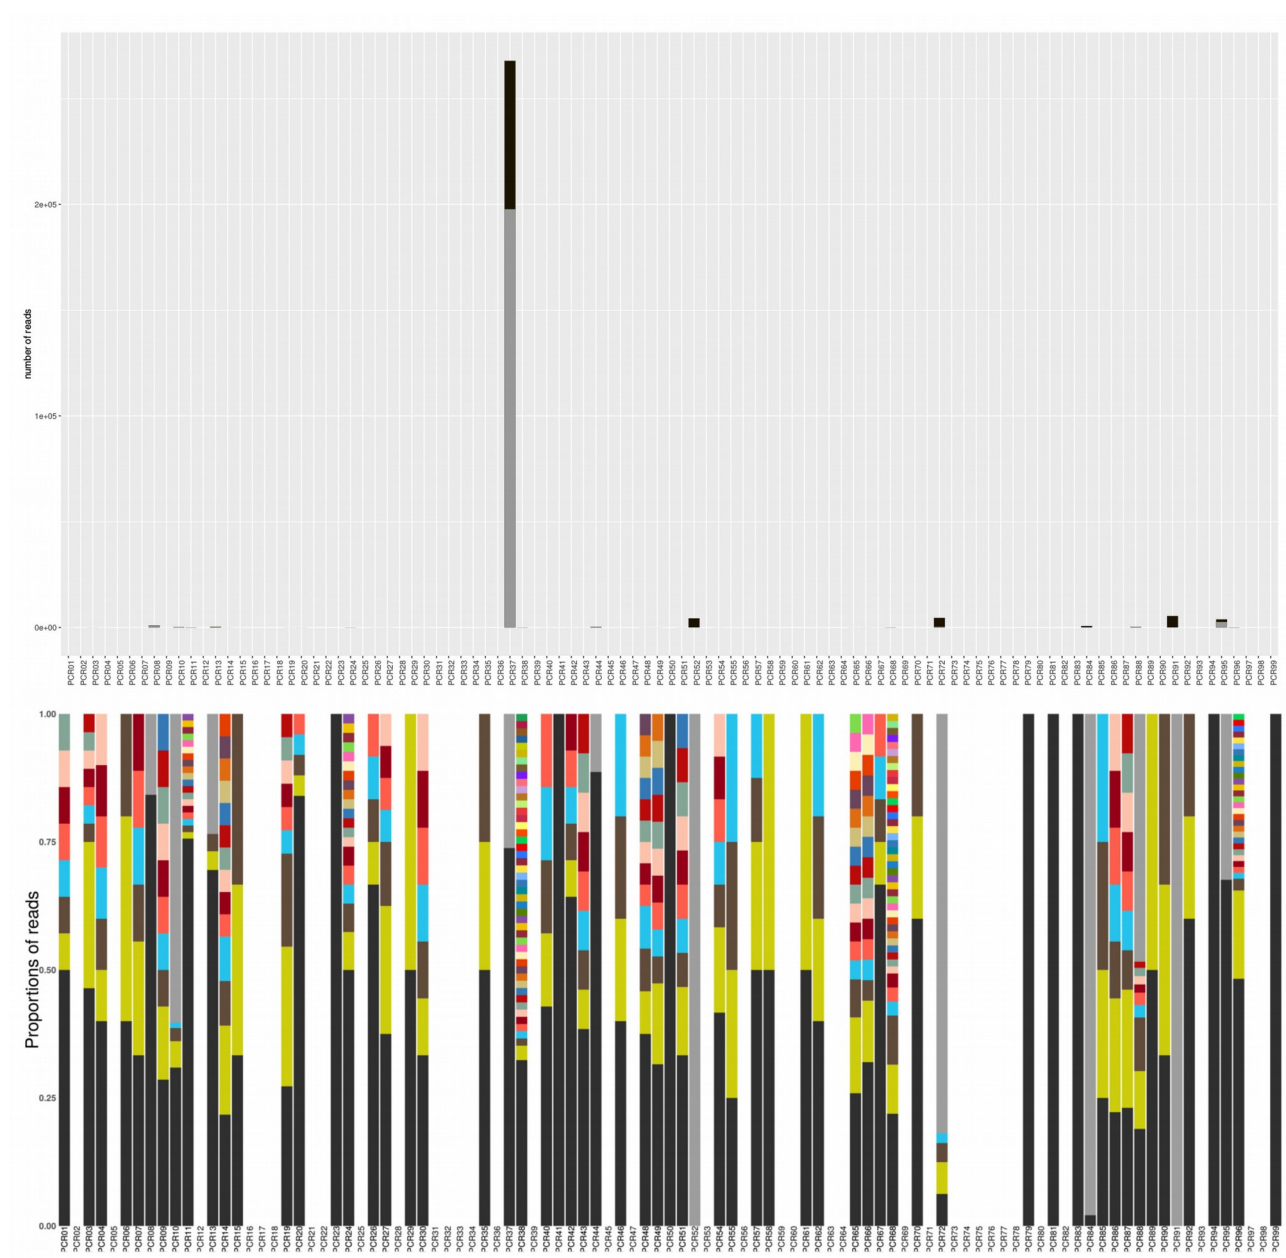

# MDS-6

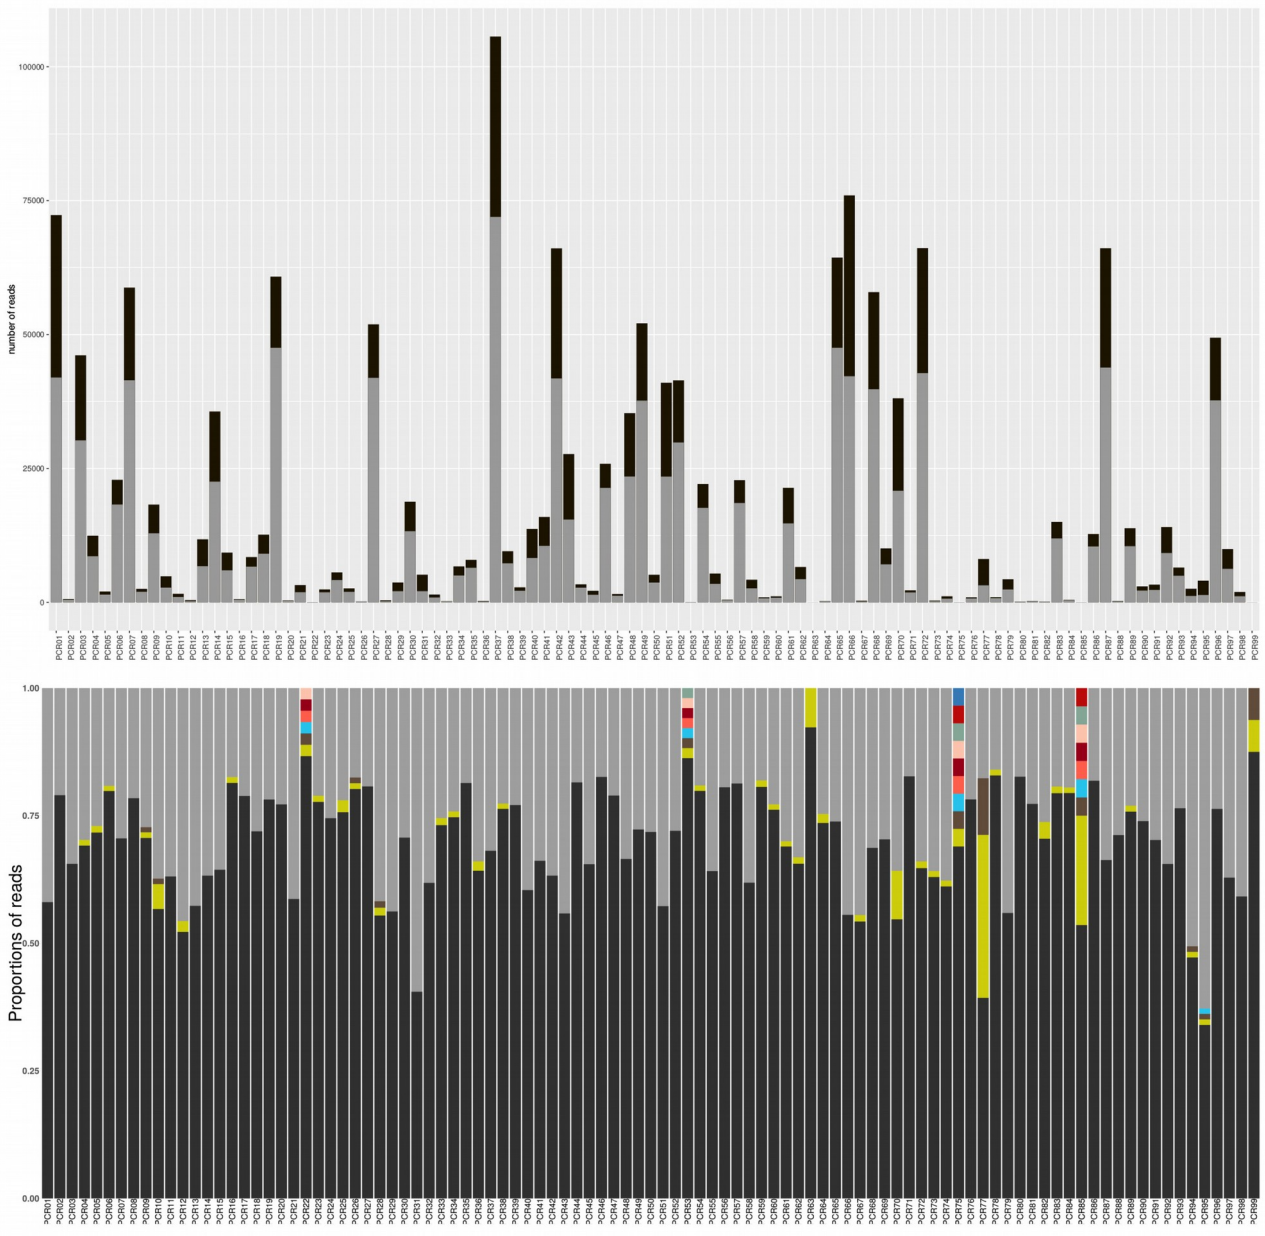



# MDS-11

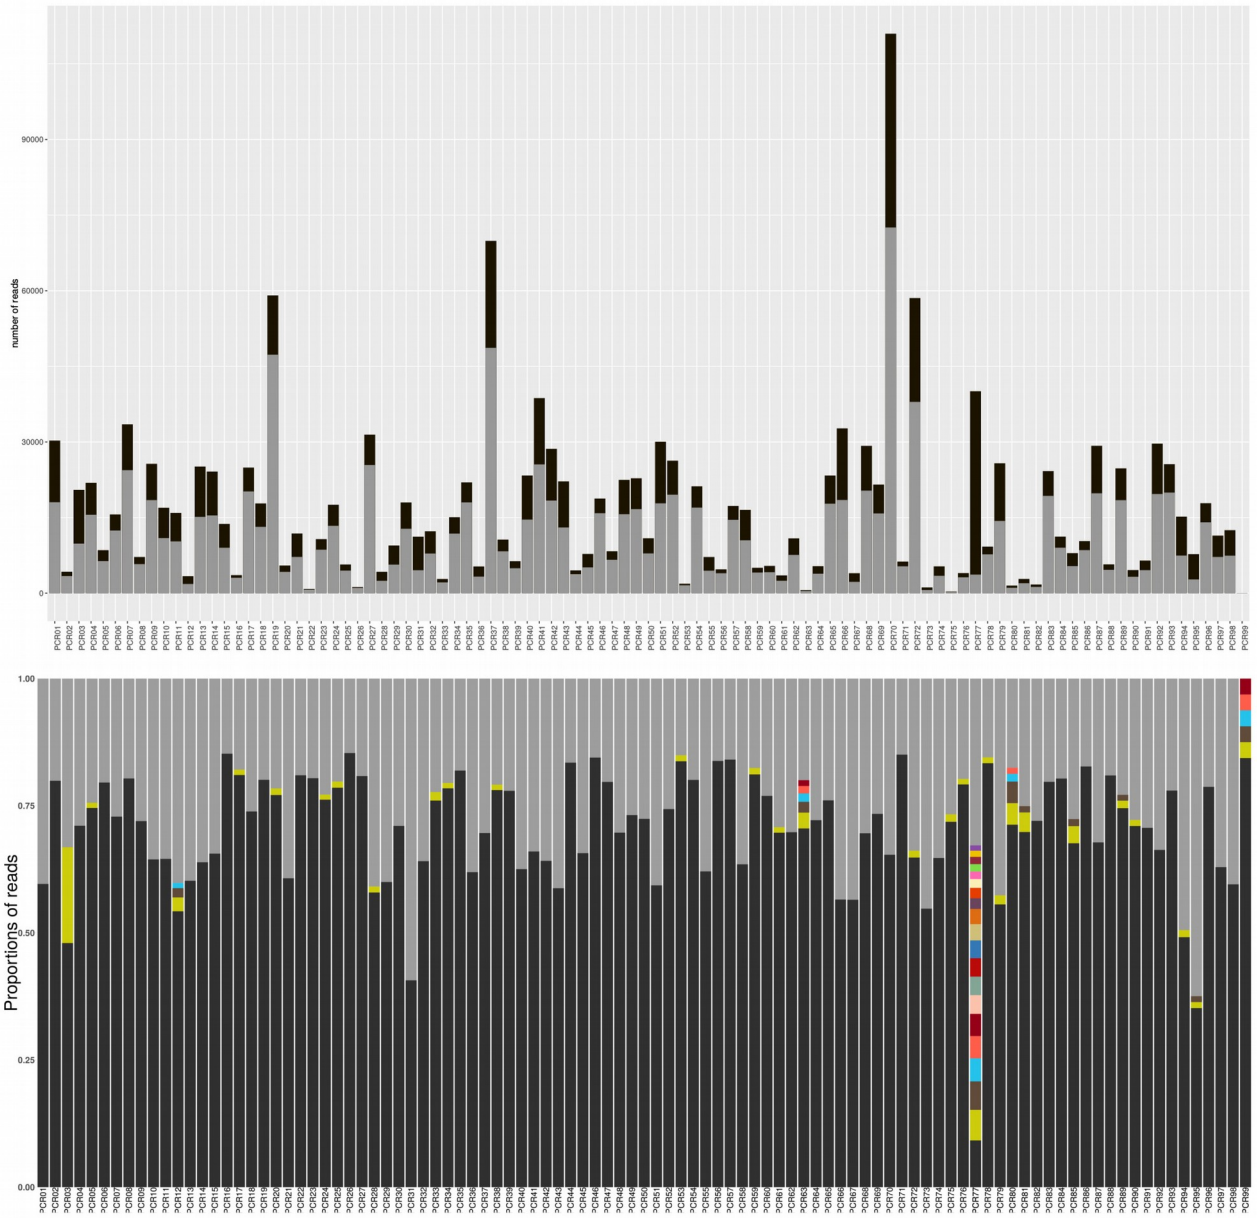



# MDS-12

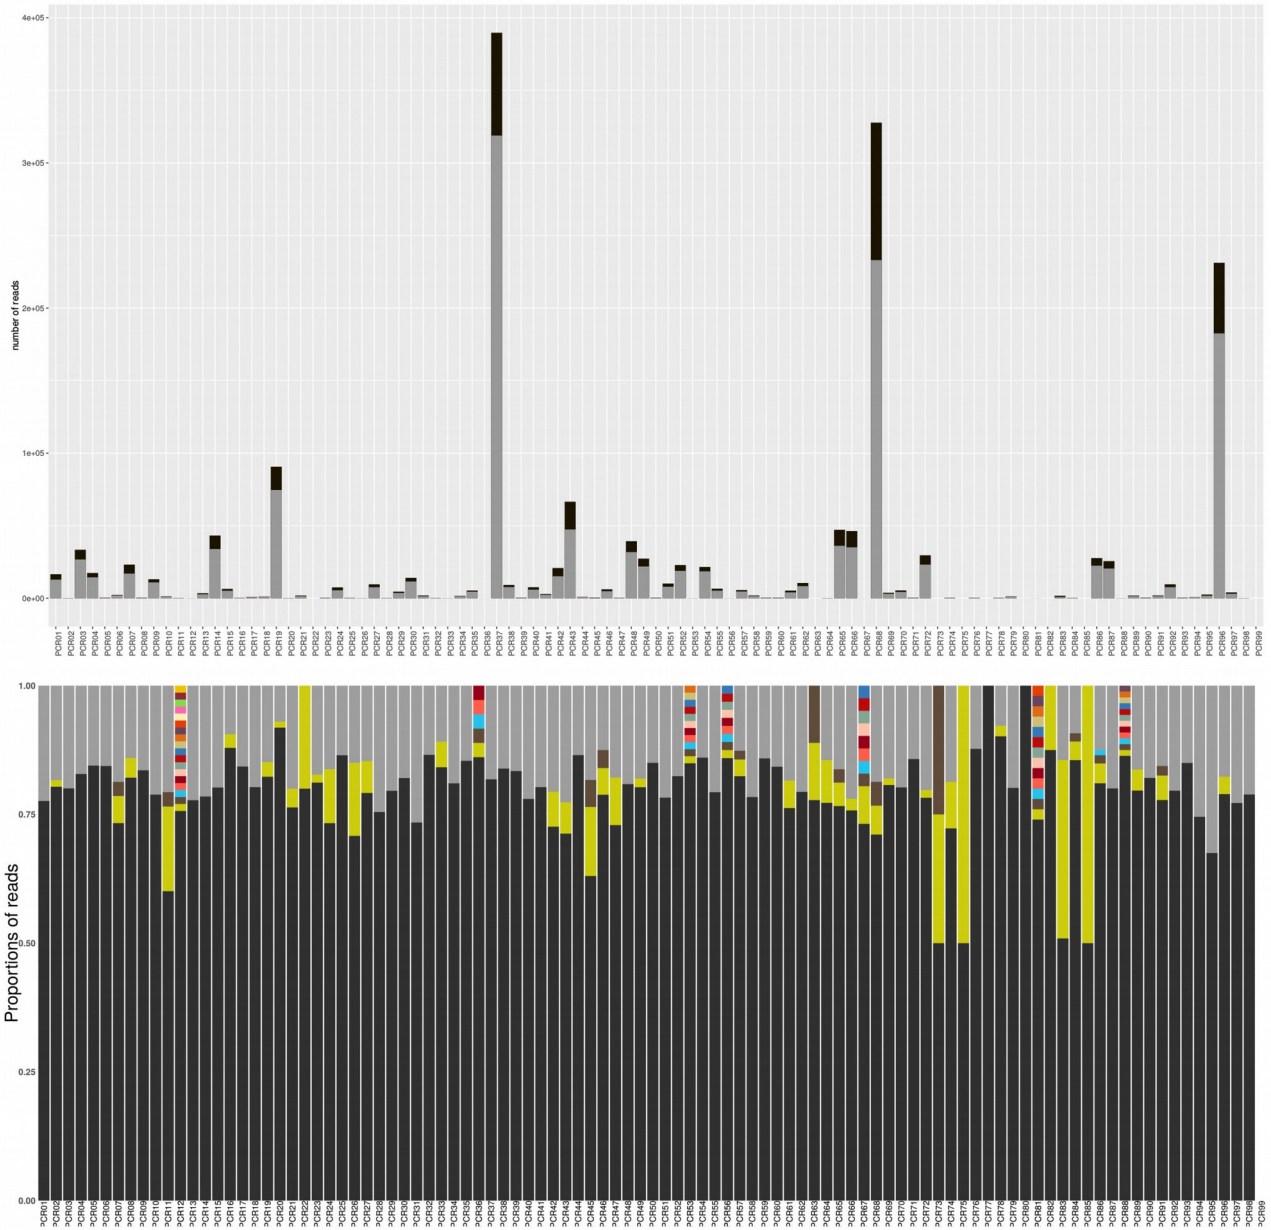

# MDS-14

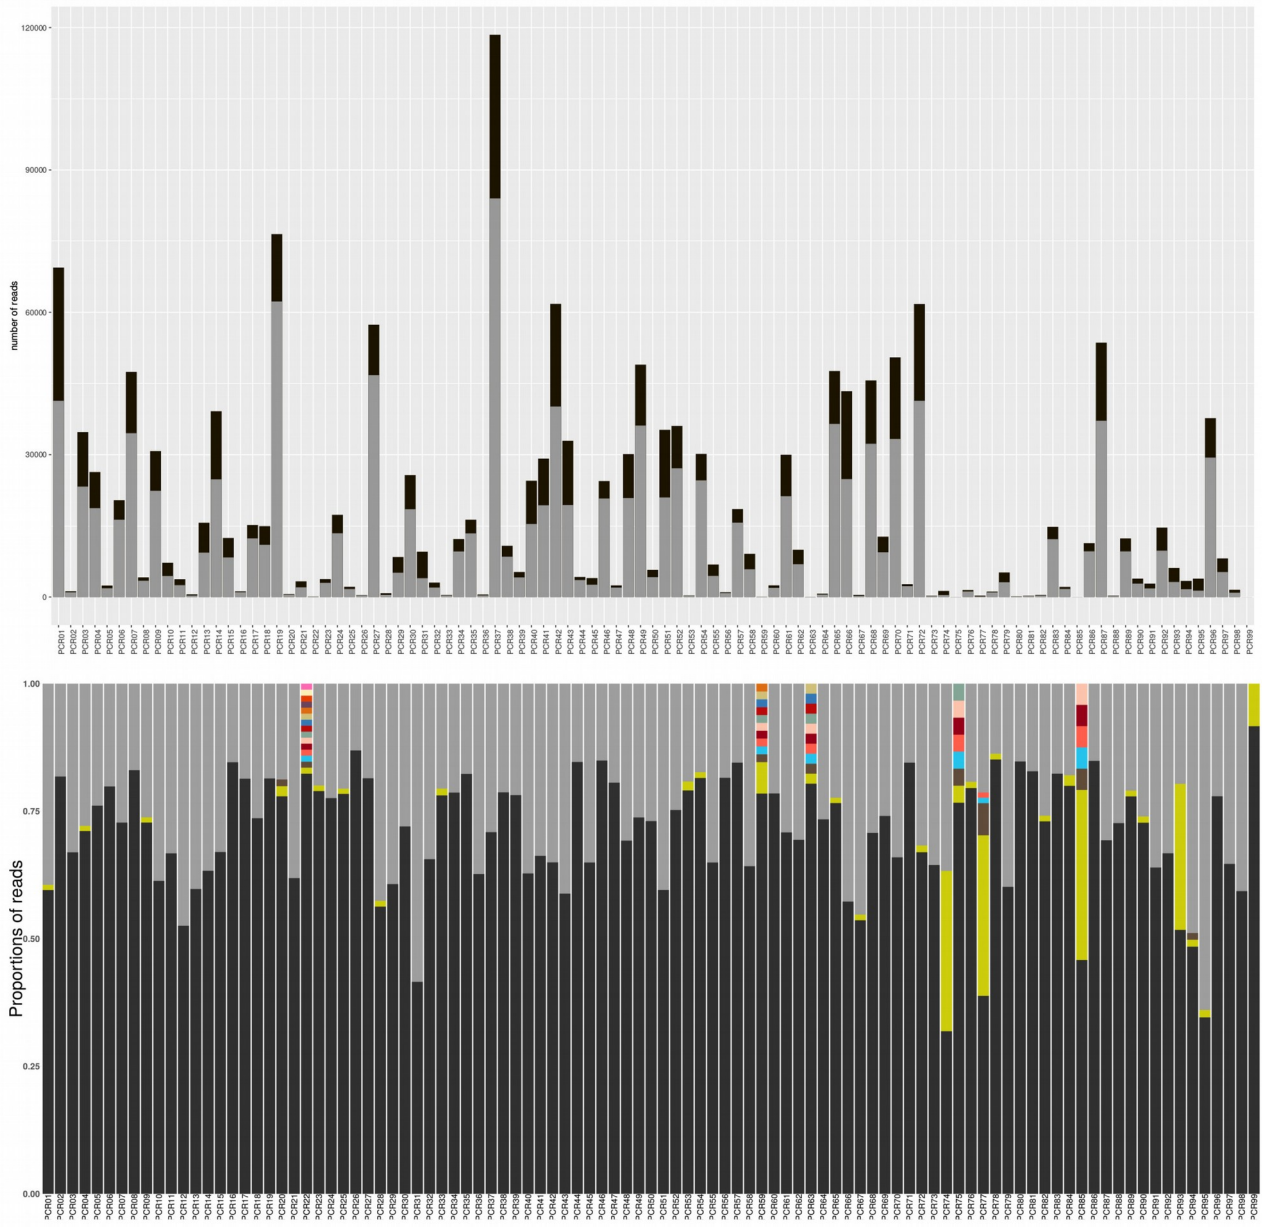

# MDS-15

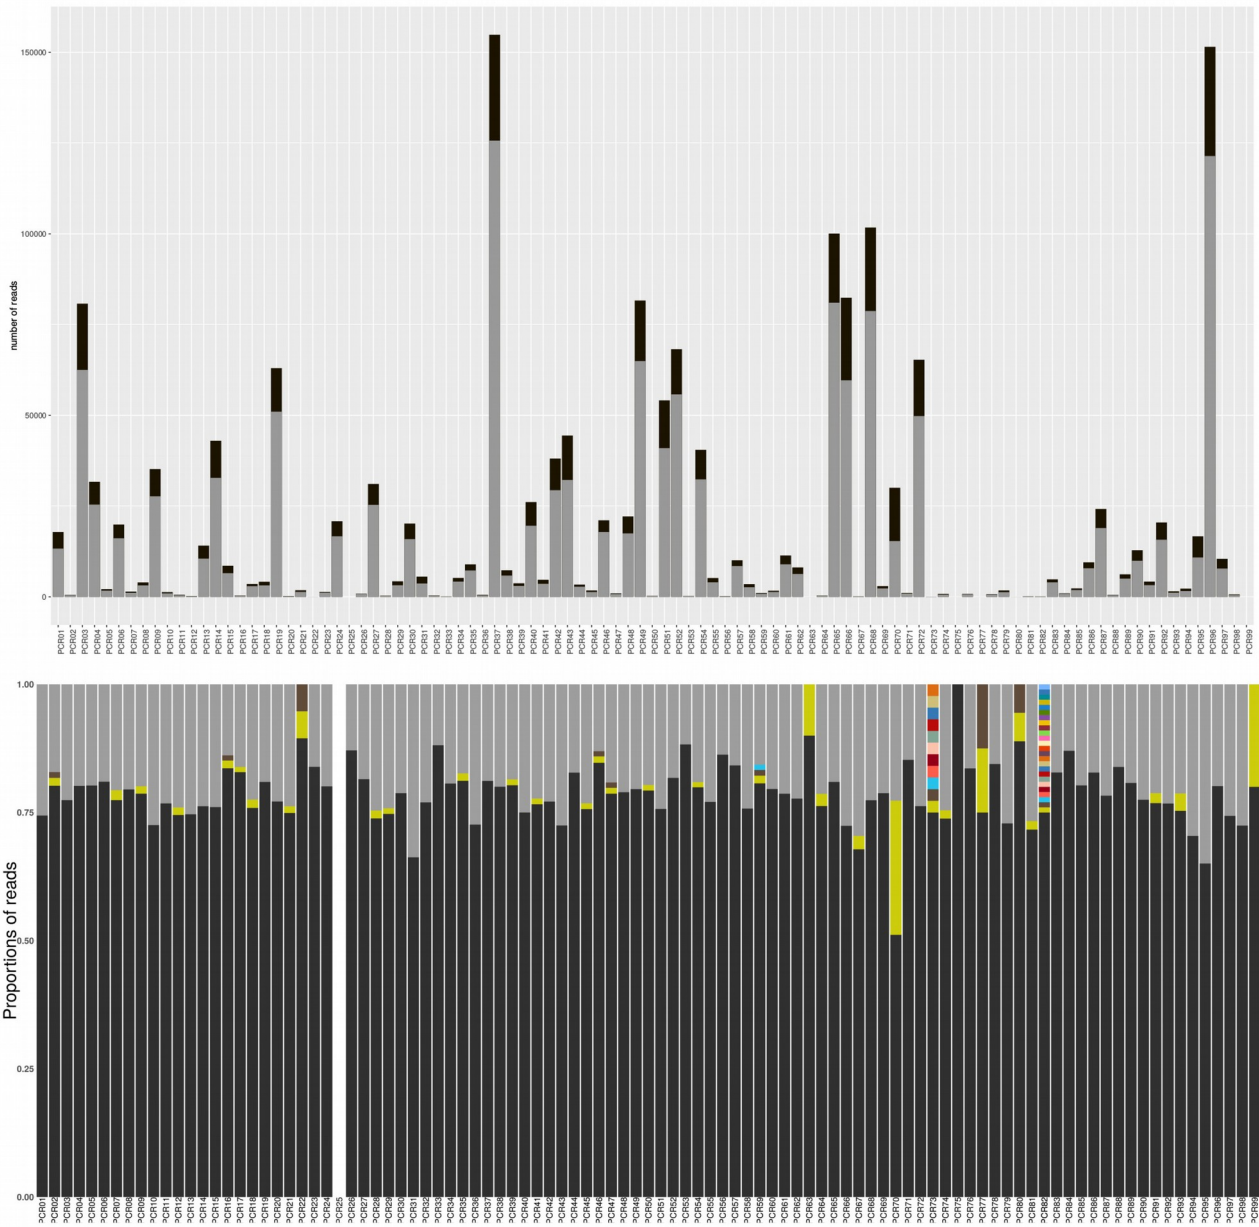

# MDS-16

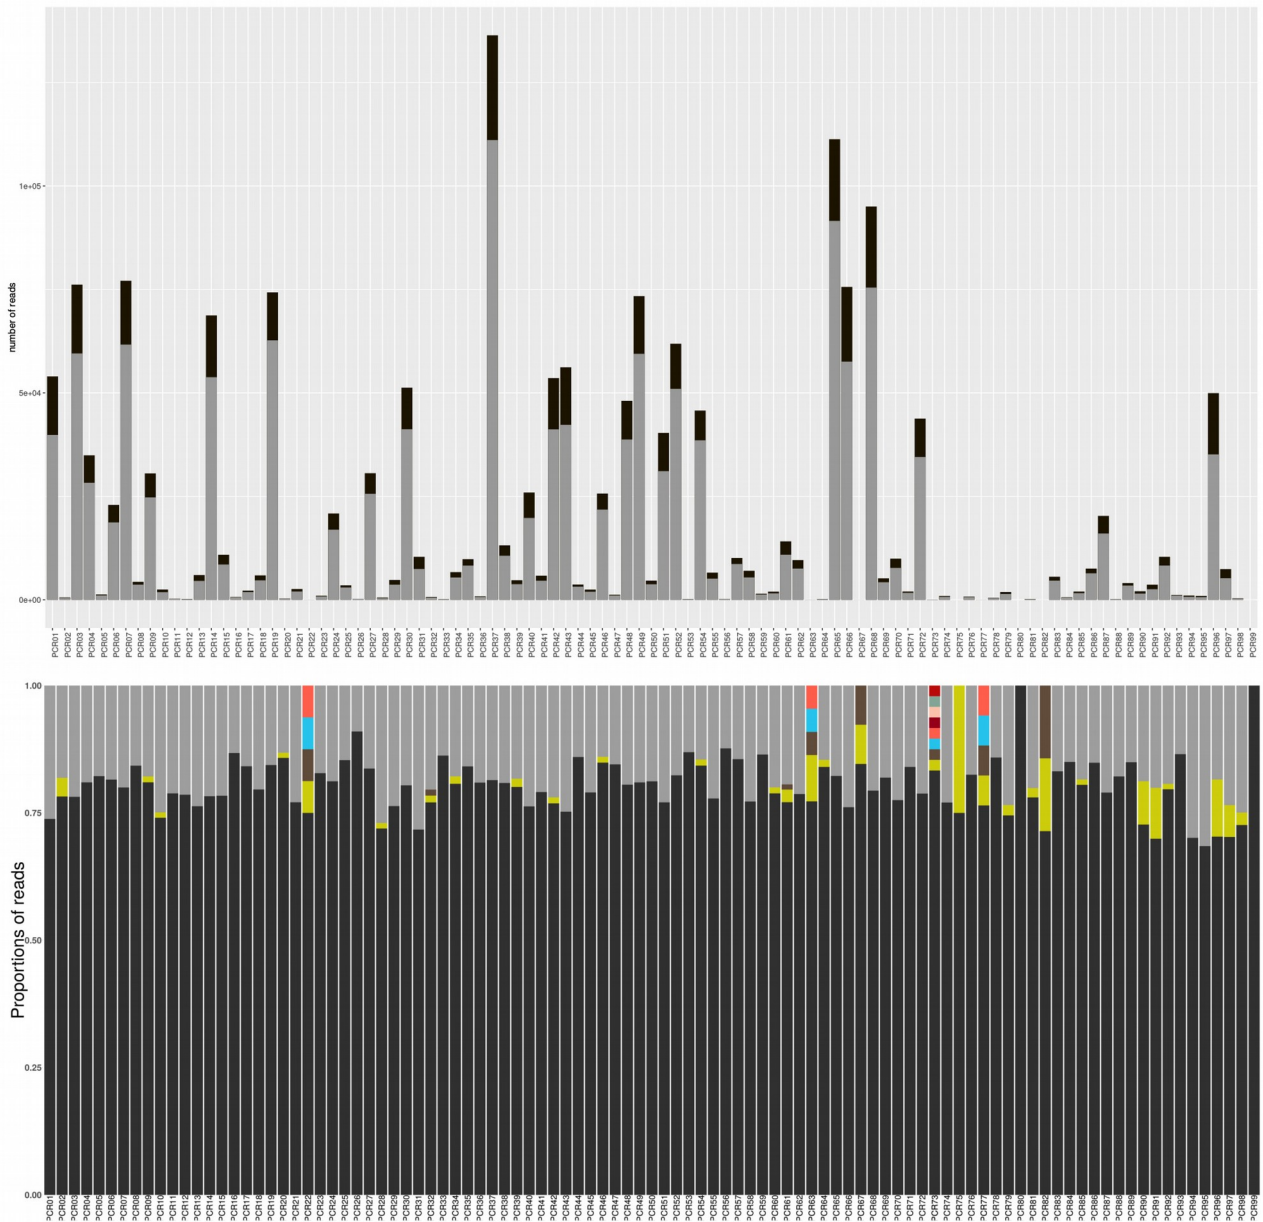

# PR2

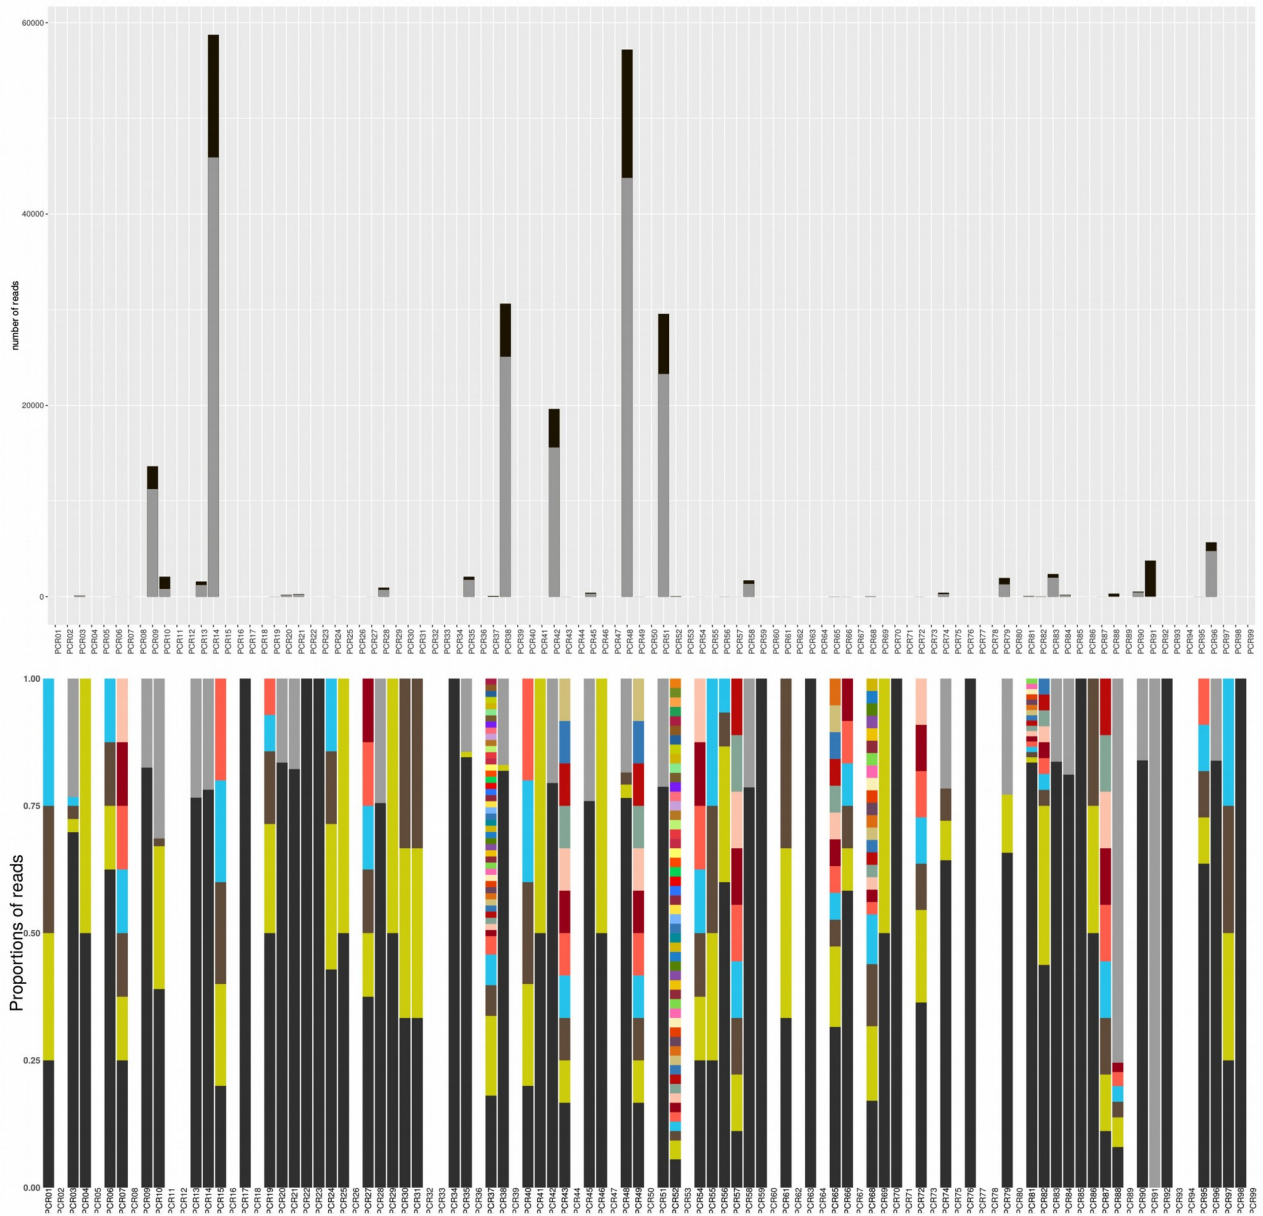

## 5- Primers used as input of V-ASAP for Zika data

List of the primers used as input of V-ASAP in the Zika study. These primers correspond to the 22 nucleotides following the forward primers designed in the original study.

| ID | Forward primers        |
|----|------------------------|
| 1  | CTAGCAACAGTATCAACAGGTT |
| 2  | TGAGAATAATCAATGCTAGGAA |
| 3  | AACACGACGTCAACTTGGGTTG |
| 4  | TAGGGACTTTGTGGAAGGTATG |
| 5  | GGGGAAATGGATGTGGACTTTT |
| 6  | CCTTGACTTTTCAGATTTGTAT |
| 7  | GTGTACCGCAGCGTTCACATTC |
| 8  | CTGGCACAGGAGTGGCAGCACC |
| 9  | TCTTATCCACAGCCGTCTCTGC |
| 10 | AAAACCCCATGTGGAGAGGTCC |
| 11 | TAAGGGAAAGGAGGCTGTACAC |
| 12 | ACATGTGGAACAAGAGGACCAT |
| 13 | CCTGGGAGGATTTTCAATGAGT |
| 14 | TTGGCAATACGAGCGATGGTTG |
| 15 | GTTGGCCTGATATGCGCATTGG |
| 16 | ACCCTTTCAGCTGGAGCGTGG  |
| 17 | CGCCTGGGACGGGCACAGCGAG |
| 18 | GATGCTGAAGAAGAAGCAGCTA |
| 19 | GATCCCTCAAGTATAGCAGCAA |
| 20 | CTCAGCAGAAAGACTTTTGAGA |
| 21 | CACTGGCTTGAAGCAAGAATGC |
| 22 | GAGTGCTCAAACCGAGGTGGAT |
| 23 | ATAGGGAAGATGGGCTTTGGAA |
| 24 | AGCAACCATAGGATTCTCAATG |
| 25 | CATTTTGCTCGTGGCGCACTAC |
| 26 | TTCACTGTGTAACATTTTAGG  |
| 27 | TGGAGCGGGGATACCTGCAGCC |
| 28 | AGACCAGGAGCCTTTTGTATAA |
| 29 | CACGCGGGCTGTGGTAAGCTGC |
| 30 | GACCCCAAGAAGGCACTCGTC  |
| 31 | AAGGGCAGCCGCGCCATCTGGT |
| 32 | CTTGGCATTGGCCATAATCAAG |
| 33 | GATGATTGCGTTGTGAAGCCAA |
| 34 | ACTGATGGCCAATGCCATTTGT |
| 35 | AAAACACAGTCAACATGGTGCG |
